# Supplementary material for: Prenatal ethanol exposure impairs the formation of radial glial fibers and promotes the transformation of GFAPδ-positive radial glial cells into astrocytes
Source: PubMed Central journal article supplement — Mol Med Rep. 2021 Feb 9;23(4):274. doi: 10.3892/mmr.2021.11913 (PMC7893684; doi:10.3892/mmr.2021.11913), 2021-02-09

Figure S1. Double immunostaining of GFAP $\delta$  (green) and CTIP2 (red) in the day 14.5 embryonic cortex. Immunostaining demonstrated that GFAP $\delta$  had no co-localization with CTIP2, indicating that GFAP $\delta$  was not expressed in deep layer neurons. Scale bar, 50  $\mu$ m. GFAP, glial fibrillary acidic protein; SP, subcortical plate; CP, cortical plate; IZ, intermediate zone; VZ, ventricular zone; SVZ, subventricular zone; LV, lateral ventricle; CTIP2, COUP-TF-interacting protein 2.

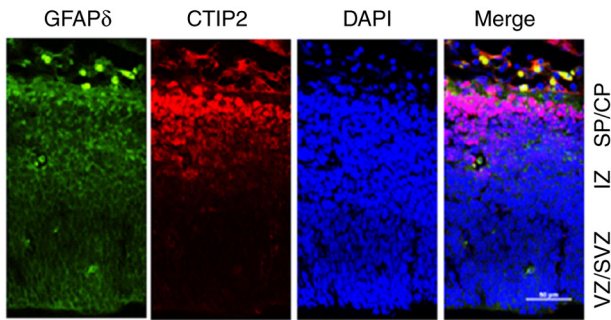

Supplement: Supplementary_Data.pdf [file Supplementary_Data.pdf]
